# Supplementary material for: Diagnosis, prognosis and bioinformatics analysis of lncRNAs in hepatocellular carcinoma
Source: PubMed Central journal article supplement (PMC5707062; doi:10.18632/oncotarget.21329), 2017-09-28
Supplement: oncotarget-08-95799-s001.pdf [file oncotarget-08-95799-s001.pdf]

# Diagnosis, prognosis and bioinformatics analysis of lncRNAs in hepatocellular carcinoma

## SUPPLEMENTARY MATERIALS

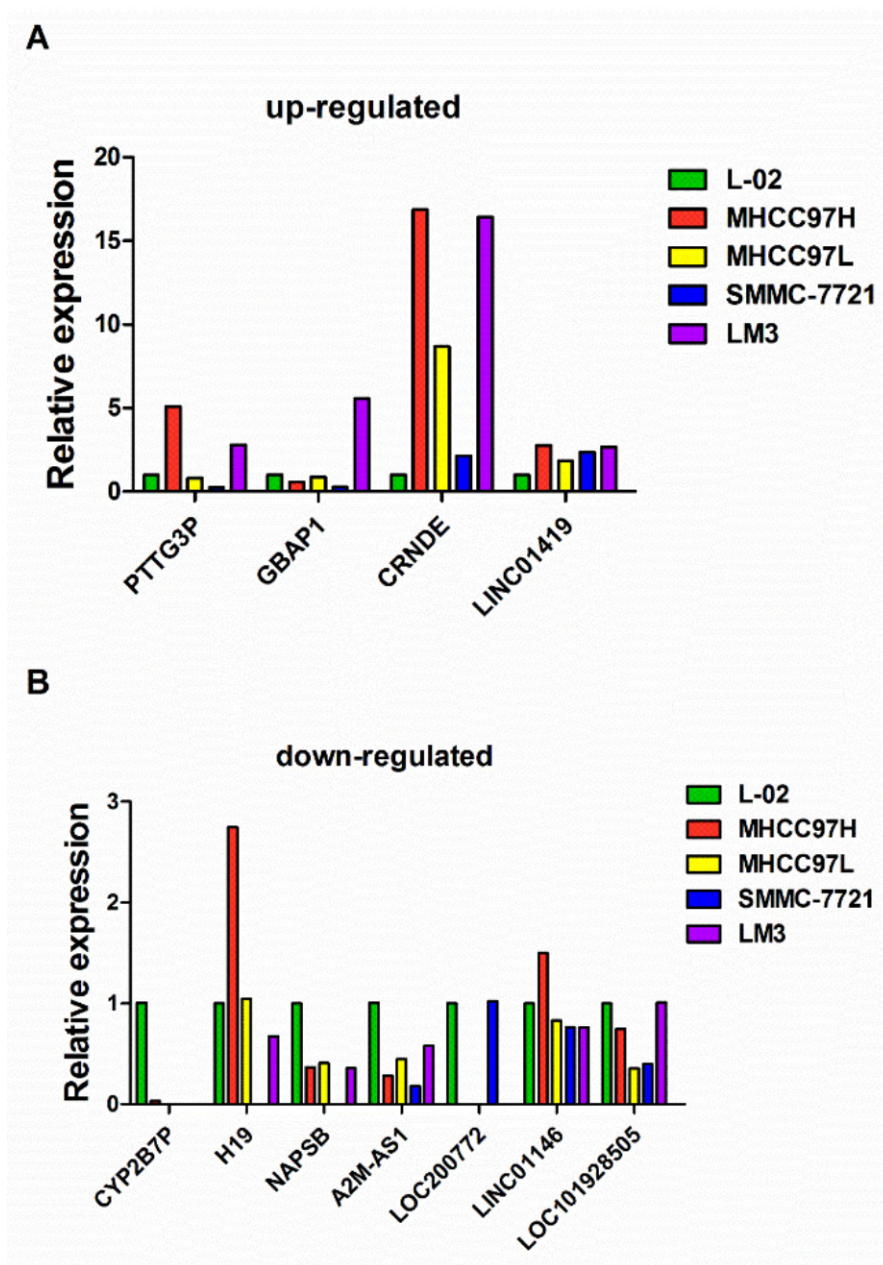

Supplementary Figure 1: The expression levels of lncRNAs in HCC cells and normal cell L-02. (A) The expression levels of up-regulated lncRNAs; (B) The expression levels of down-regulated lncRNAs.

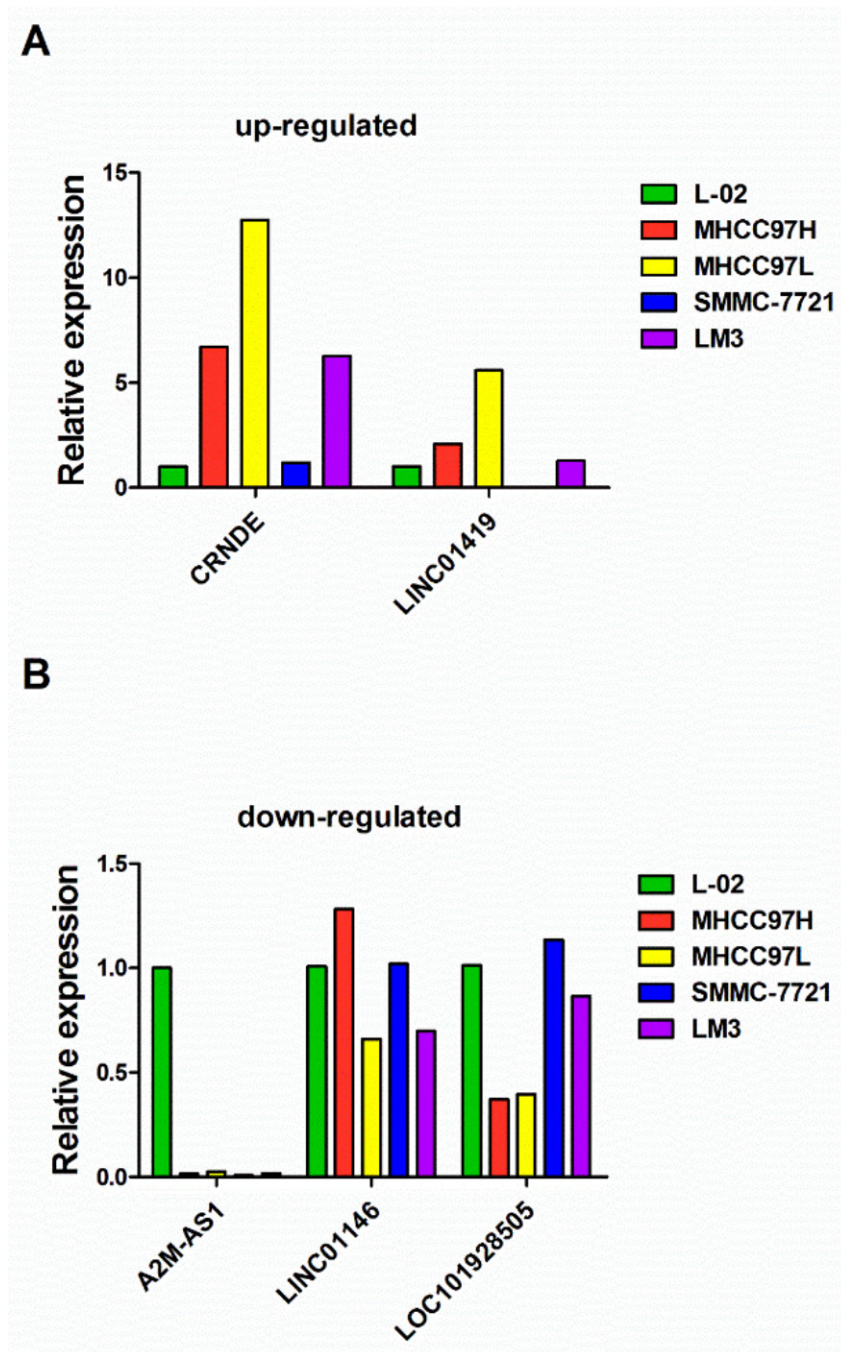

Supplementary Figure 2: The expression levels of LncRNAs in the supernatant of HCC cells and normal cell L-02. (A) The expression levels of up-regulated lncRNAs; (B) The expression levels of down-regulated lncRNAs.

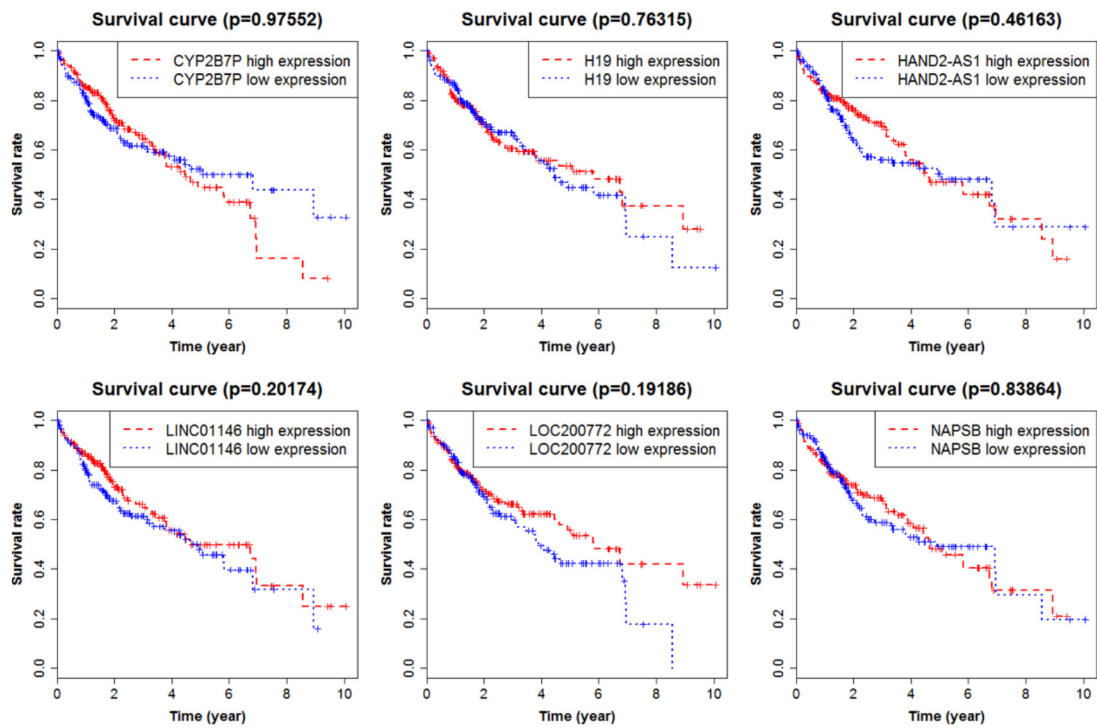

Supplementary Figure 3: Survival curves showing the relationship between the lncRNAs and the overall survival rate.

Supplementary Table 1: Clinical information of patients with tissue samples

| Sample NO. | Gender | Age | HBV | Tumor morphology | Lymph node | Metastasis | TNM Stage |
|------------|--------|-----|-----|------------------|------------|------------|-----------|
| HCC-1      | Male   | 30  | yes | T2               | N0         | M0         | II        |
| HCC-2      | Male   | 50  | yes | T1               | N0         | M0         | I         |
| HCC-3      | Male   | 39  | yes | T3a              | N0         | M0         | IIIA      |
| HCC-4      | Male   | 40  | yes | T2               | N0         | M0         | II        |
| HCC-5      | Male   | 55  | yes | T2               | N0         | M0         | II        |
| HCC-6      | Male   | 52  | no  | T2               | N0         | M0         | II        |
| HCC-7      | Male   | 41  | yes | T2               | N0         | M0         | II        |
| HCC-8      | Female | 55  | yes | T3b              | N0         | M0         | IIIB      |
| HCC-9      | Male   | 54  | yes | T1               | N0         | M0         | I         |
| HCC-10     | Male   | 44  | yes | T4               | N0         | M0         | IIIC      |
| HCC-11     | Male   | 48  | yes | T2               | N0         | M0         | II        |
| HCC-12     | Male   | 59  | yes | T4               | N1         | M0         | IVA       |
| HCC-13     | Female | 38  | yes | T2               | N0         | M0         | II        |
| HCC-14     | Male   | 47  | yes | T3b              | N0         | M0         | IIIB      |
| HCC-15     | Male   | 54  | yes | T4               | N1         | M1         | IVB       |

Supplementary Table 2: The sequence of primers

| Name         | Forward                         | Reverse                         |
|--------------|---------------------------------|---------------------------------|
| GAPDH        | 5'-TGTGTTGGCGTACAGGTCTTTG-3'    | 5'-GGGAAATCGTGCGTGACATTAAG-3'   |
| PTTG3P       | 5'-ATGCTCCCACATCCTTACCTACT-3'   | 5'-AACGGGGTCCATTGGTCTTTA-3'     |
| GBAP1        | 5'-GCATCATCACAAACCTCCGC-3'      | 5'-TCCTTCTTCTGACTGGCAACC-3'     |
| CRNDE        | 5'-ATGGAAAAATCAAAGTGCTCGTG-3'   | 5'-CCTAACCTTCTTCTGCGTGACAAC-3'  |
| LINC01419    | 5'-GCTTTGTTCTTTCGCTCTTCAT-3'    | 5'-TTCGTGGTCTCGCTGGCT-3'        |
| CHL1-AS1     | 5'-GACTTCTCCCTACTTCGTTCACTGG-3' | 5'-CCCGAGCATTTTTGTTTCTTCTG-3'   |
| CYP2B7P      | 5'-CTGCCTCCTCCTACTGTTACCTT-3'   | 5'-CCCCCTTAGCGATGTTTATTTA-3'    |
| H19          | 5'-ATCAAAGACACCATCGGAACAG-3'    | 5'-CAAGGTCAGAAACAAAGAGACAGAA-3' |
| NAPSB        | 5'-CACTACATCCCACCCCTCAAA-3'     | 5'-CAGTAAGCCCACCTTCACACG-3'     |
| HAND2-AS1    | 5'-GCGATTTTGAAGTGCGGATA-3'      | 5'-ATAACAGGCGGTGGAGAGGAC-3'     |
| A2M-AS1      | 5'-TGAAGCCTACTCAGACCGCA-3'      | 5'-CTACCGTTCCCAATAGAATACCAA-3'  |
| LOC200772    | 5'-GAACCATACATTCAACGCAAACC-3'   | 5'-ACTCATCAAAGGAGAAACAACC-3'    |
| LINC01093    | 5'-AAGTCAGTGGTCCCTAAACGG-3'     | 5'-GAGCGGCAAAGATAAACTCATAAG-3'  |
| LINC01146    | 5'-TGATTCTGCTTACTGCTTCCCC-3'    | 5'-ATCCCTCCCCACTCTCTTCTAC-3'    |
| LOC101928505 | 5'-TTGTGTTCAATTCTCATCCCGC-3'    | 5'-CACTATCTCTCCTGCCACCTTGT-3'   |
